# Supplementary material for: Intramolecular charge transfer in 4-cyano-(4′-methylthio)diphenyl-acetylene
Source: Royal Society of Chemistry journal article supplement (doi:10.1039/b210886k), 2003-02-24
Supplement: esi.pdf [file esi.pdf]

## Supporting information:

**Table S1.** The energies, dipole moments, and configuration contributions for the ground state, 8 singlet excited states, and 8 triplet excited states as calculated by CISD with 4 electrons and 11 molecular orbitals in active space.

| State          | Energy / $\text{cm}^{-1}$ | Dipole Moment / D | Coefficients of the MO configurations                                                                                      |
|----------------|---------------------------|-------------------|----------------------------------------------------------------------------------------------------------------------------|
| S <sub>0</sub> | 0                         | 4.235             | 0.99 of 1                                                                                                                  |
| S <sub>1</sub> | 27683.5                   | 1.493             | -0.65 of 5, 0.14 of 7, -0.2 of 14                                                                                          |
| S <sub>2</sub> | 30516.5                   | 12.643            | 0.57 of 2, 0.33 of 3, -0.15 of 11, 0.15 of 12                                                                              |
| S <sub>3</sub> | 32614.9                   | 1.548             | -0.14 of 5, -0.65 of 7, -0.21 of 16                                                                                        |
| S <sub>4</sub> | 36408.3                   | 11.143            | -0.69 of 6                                                                                                                 |
| S <sub>5</sub> | 38305.0                   | 10.970            | -0.11 of 2, 0.43 of 3, -0.12 of 9, 0.52 of 11                                                                              |
| S <sub>6</sub> | 40209.7                   | 13.288            | 0.45 of 4, -0.52 of 13                                                                                                     |
| S <sub>7</sub> | 41404.2                   | 17.284            | -0.22 of 2, 0.34 of 3, -0.38 of 11, -0.15 of 12, 0.18 of 20, -0.29 of 57, -0.12 of 58, -0.18 of 66, -0.14 of 67, 0.1 of 77 |
| S <sub>8</sub> | 45100.7                   | 1.656             | -0.54 of 8, 0.41 of 17                                                                                                     |
| T <sub>1</sub> | 20540.7                   | 1.137             | 0.64 of 5, -0.16 of 7, 0.23 of 14                                                                                          |
| T <sub>2</sub> | 24600.4                   | 10.586            | 0.54 of 2, 0.34 of 3, -0.24 of 11, 0.12 of 12                                                                              |
| T <sub>3</sub> | 27175.1                   | 2.049             | 0.15 of 5, 0.64 of 7, 0.24 of 18                                                                                           |
| T <sub>4</sub> | 28692.4                   | 11.593            | 0.44 of 3, -0.13 of 9, 0.52 of 11, -0.13 of 12                                                                             |
| T <sub>5</sub> | 31977.3                   | 10.323            | -0.7 of 6                                                                                                                  |
| T <sub>6</sub> | 35318.7                   | 12.518            | -0.39 of 4, 0.59 of 13                                                                                                     |
| T <sub>7</sub> | 43074.9                   | 27.478            | 0.35 of 2, -0.36 of 3, 0.35 of 11, -0.19 of 20, -0.16 of 58, -0.15 of 66                                                   |
| T <sub>8</sub> | 43970.8                   | 3.798             | 0.53 of 8, -0.43 of 17                                                                                                     |

**Table S2.** The energy and configuration assignment for the lowest-energy transitions as calculated by single and double excitation from occupied orbitals to the virtual orbitals.

| Transition     | Assignment <sup>a</sup> | Energy/eV | Transition      | Assignment <sup>a</sup> | Energy/eV |
|----------------|-------------------------|-----------|-----------------|-------------------------|-----------|
| 1 <sup>b</sup> |                         | 0         | 14              | H(-1) → L(3)            | 6.843     |
| 2              | H → L                   | 4.566     | 15              | H(-1) → L(4)            | 6.692     |
| 3              | H → L(1)                | 4.764     | 16              | H(-1) → L(5)            | 7.555     |
| 4              | H → L(2)                | 6.296     | 17              | H(-1) → L(6)            | 6.696     |
| 5              | H → L(3)                | 3.460     | 18              | H(-1) → L(7)            | 7.229     |
| 6              | H → L(4)                | 4.273     | 19              | H(-1) → L(8)            | 7.623     |
| 7              | H → L(5)                | 4.142     | 20 <sup>c</sup> | H → L(1),<br>H(-1) → L  | 8.014     |
| 8              | H → L(6)                | 6.472     | 57 <sup>c</sup> | H → L                   | 12.865    |
| 9              | H → L(7)                | 7.150     | 58 <sup>c</sup> | H → L,<br>H → L(1)      | 11.629    |
| 10             | H → L(8)                | 8.374     | 66 <sup>c</sup> | H → L,<br>H(-1) → L     | 9.890     |
| 11             | H(-1) → L               | 4.694     | 67 <sup>c</sup> | H → L,<br>H(-1) → L(1)  | 9.755     |
| 12             | H(-1) → L(1)            | 5.994     | 77 <sup>c</sup> | H → L(1)                | 13.376    |
| 13             | H(-1) → L(1)            | 5.369     |                 |                         |           |

a. H is for HOMO, and L is for LUMO. b In the first configuration, all of the electrons are paired in occupied orbitals and there is no transition to the virtual orbitals. c Refers to double excitation.
